# Supplementary material for: Assessing international alcohol consumption patterns during isolation from the COVID-19 pandemic using an online survey: highlighting negative emotionality mechanisms
Source: PubMed Central journal article supplement (PMC7692002; doi:10.1136/bmjopen-2020-044276), 2020-11-26
Supplement: bmjopen-2020-044276supp001.pdf [file bmjopen-2020-044276supp001.pdf]

## SUPPLEMENTARY MATERIALS

### Demographics for drinkers

|            | Age   | Sex     | Country | SES   | Relationship |                      |     |              |     |
|------------|-------|---------|---------|-------|--------------|----------------------|-----|--------------|-----|
| Mean       | 31.4  | Male    | 599     | Total | 49           | Lower                | 328 | Single       | 449 |
| SD         | 13.2  | Female  | 248     | UK    | 347          | Mid                  | 176 | Relationship | 408 |
| Range      | 18-90 | Other   | 12      | US    | 223          | Higher               | 250 |              |     |
| Depression |       | Anxiety |         | PTSD  |              | Depression & Anxiety |     |              |     |
| 41         |       | 27      |         | 3     |              | 35                   |     |              |     |

### Demographic analysis for study dropouts

Although a majority of the dropout subjects (n=1,515) who entered the study provided no data (n=981), we performed a demographic analysis on dropout subjects who provided this information (n=481) to assess if those who completed the survey differed in demographic factors from those who did not. The mean age of dropout subjects was  $26.58 \pm 11.11$  years [CI: 25.59-27.58] (range= 18-80 years), significantly younger than the mean age of individuals who completed the survey (U= 3.69, [CI: 1.15-3.54]  $p < .0001$ ). Further, more males (n=387) than females (n=87) or other genders (n=7) dropped out of the study prior to completion ( $X^2 = 61.23$ ,  $p < .0001$ ).

### Sub-sample analysis by country

#### United Kingdom (UK)

In the UK, the change in problem drinking severity (AUDIT-C) was  $1.05 \pm 1.46$  [CI: 0.91-1.19] (range: 0-8), and the mean change in the amount consumed was  $5.93 \pm 11.75$  [CI: 4.82-7.05], units per week (range: 0-120). Current problem drinking severity (full AUDIT) was  $4.09 \pm 4.94$  [CI: 3.62-4.56] (range: 0-27). Of the subjects who reported they consume alcohol (n=434), the change in severity from pre-quarantine to quarantine was a decrease of  $-0.16 \pm 2.15$ ,

[CI: 0.3-0.06] (range -8-6) but not significantly so ( $U = -1.38$ , [CI: 0.01-0.89]  $p = .19$ ). The units of alcohol consumed per week was significantly increased during the quarantine period ( $11.25 \pm 17.73$  units, [CI: 9.36-13.13] range = 1-120) compared to November ( $10.94 \pm 14.17$  units, [CI: 9.44-12.45] range = 0-150),  $U = 3.0$ , [CI: 0-0.7]  $p = .003$ . Further, 60 (14%) subjects reported abstinence from alcohol consumption during the quarantine period. More subjects reported a decrease ( $n = 151$ , 43%) or an increase ( $n = 130$ , 39%) as opposed to no change ( $n = 61$ , 18%) of weekly alcohol consumption from November to the quarantine period ( $X^2 = 7.2$ ,  $p = .007$ ). The Oxford COVID-19 Government Response Tracker [24] indicated that the lockdown stringency index in the UK during data collection (05/12/2020 to 05/28/2020) was 88.89, with 15,684 confirmed cases and 488 deaths.

#### United States (US)

In the US, change in problem drinking severity (AUDIT-C) was  $1.01 \pm 1.55$  units [CI: 0.85-1.17] (range: 0-8), and the mean change in the amount consumed was  $3 \pm 5.51$  [CI: 2.39-4] units per week (range: 0-34). The current problem drinking severity (full AUDIT) was  $3.48 \pm 4.95$  [CI: 3.4] (range: 0-32). Of the subjects who reported they consume alcohol ( $n = 353$ ), the change in severity from pre-quarantine to quarantine was a decrease of  $-0.11 \pm 2.42$  [CI: -0.43-0.21], range -8-8 ( $U = -0.66$ , [CI: 0.05-0.9]  $p = .51$ ), but not significantly so. The units of alcohol consumed per week increased between the quarantine period ( $7.39 \pm 11.45$  units, [CI: 5.88-8.9] range = 0-80) and November ( $6.93 \pm 9.78$  units, [CI: 5.88-8.9] range = 0-96), but not significantly so ( $U = 1.1$ , [CI: 0.01-0.94]  $p = .29$ ). Further, 44 (13%) subjects reported abstinence from alcohol consumption during the quarantine period. More subjects reported a decrease ( $n = 90$ , 41%) or an increase ( $n = 88$ , 40%) as opposed to no change ( $n = 45$ , 21%) of weekly alcohol consumption from November to the quarantine period ( $X^2 = 8.15$ ,  $p = .004$ ). The Oxford COVID-19 Government Response Tracker [24] indicated that the lockdown stringency index in the US during data collection (05/12/2020 to 05/28/2020) was 70.92, with 1,347,916 confirmed cases and 80,684 deaths.

#### Canada

In Canada, change in problem drinking severity (AUDIT-C) was  $0.67 \pm 1.45$  [CI: 0.31-1.03]

(range: 0-8), and the mean change in the amount consumed was  $3.03 \pm 7.45$  [CI: 1.17-4.89] units per week (range: 0-49). The current problem drinking severity (full AUDIT) was  $2.78 \pm 4.24$  [CI: 1.7-3.85] (range: 0-24). Of the subjects who reported they consume alcohol ( $n=35$ ), the change in severity from pre-quarantine to quarantine was an increase of  $0.16 \pm 2.2$ , [CI: -0.62-0.95] (range: -8-5), but not significantly so ( $U= .77$ , [CI: 0.03-0.98]  $p= .44$ ). The units of alcohol consumed per week was decreased during the quarantine period ( $8.03 \pm 14.22$  units, [CI: ] range= 0-50) and November ( $6.71 \pm 9.49$  units, [CI: 3.46-9.97] range = 0-25), although not significantly so ( $U= 0.17$ , [CI: 0.59-1.0]  $p= .86$ ). Further, 4 (12%) subjects reported abstinence from alcohol consumption during the quarantine period. More subjects reported an increase ( $n= 16$ , 46%) as opposed to a decrease ( $n= 10$ , 29%) or no change ( $n= 9$ , 26%) of weekly alcohol consumption from November to the quarantine period, although not significantly so ( $X^2= 0.03$ ,  $p= .85$ ). The Oxford COVID-19 Government Response Tracker [24] indicated that the lockdown stringency index in Canada during data collection (05/12/2020 to 05/28/2020) was 70.83, with 69,981 confirmed cases and 4,993 deaths.

### Sub-sample analysis by gender

#### Males

For the males in our sample ( $n=1,000$ ), the change in problem drinking severity (AUDIT-C) was in  $0.91 \pm 1.53$  [CI: 0.82-1.01] (range: 0-8) and the mean change in the amount consumed was  $3.88 \pm 8.84$  [CI: 3.33-4.42] units per week (range: 0-120). The current problem drinking severity (full AUDIT) was  $2.99 \pm 4.61$  [CI: 2.71-3.28] (range: 0-32), with 403 males included that do not consume alcohol. Of males who reported they consume alcohol ( $n= 597$ ), the change in severity from pre-quarantine to quarantine was a decrease of  $-0.4 \pm 2.4$ , [CI: -0.5- -0.21] range -8-8 ( $U= 3.57$ , [CI: 0.0-0.03]  $p < .0001$ ). The units of alcohol consumed per week was significantly decreased during the quarantine period ( $8.52 \pm 14$  units, [CI: 7.33-9.71] range= 0-120) compared to November ( $9.23 \pm 12.62$  units, [CI: 8.21-10.24] range = 0-120),  $U= -5.2$ , [CI: 0.0-0.13]  $p < .0001$ . Further, 128 (20%) males reported abstinence from alcohol consumption during the quarantine period. More males reported a decrease ( $n= 278$ , 47%) or an increase ( $n= 204$ , 34%) as opposed to no change ( $n= 115$ , 19%) of weekly alcohol consumption from November to the quarantine period ( $X^2= 15.94$ ,  $p < .0001$ ).

## Females

For females in our sample (n=342), the change in problem drinking severity (AUDIT-C) was  $0.81 \pm 1.1$  [CI: 0.69-0.92] (range: 0-8) and the mean change in the amount consumed was  $2.82 \pm 4.6$  [CI: 2.31-3.32] units per week (range: 0-38). The current problem drinking severity (full AUDIT) was  $3.14 \pm 4.47$  [CI: 3.13-4] (range: 0-21), with 95 females included that do not consume alcohol. Of females who reported they consume alcohol (n= 247), the change in severity from pre-quarantine to quarantine was an increase of  $0.12 \pm 1.6$ , [CI: -0.08-0.32] range 5-8, although not significantly so (U= 1.17, [CI: 0.01-0.93]  $p = .24$ ). The units of alcohol consumed per week was decreased during the quarantine period ( $6.94 \pm 10.62$  units, [CI: ] range= 0-80) compared to November ( $6.01 \pm 8.08$  units, [CI: 5-7.02] range = 0-90), although not significantly so (U= -0.57, [CI: 0.1-0.99]  $p = .57$ ). Further, 43 (17%) females reported abstinence from alcohol consumption during the quarantine period. More females reported a decrease (n= 102, 41%) or an increase (n= 101, 41%) as opposed to no change (n= 44, 18%) of weekly alcohol consumption from November to the quarantine period ( $X^2 = 13.46$ ,  $p = .0002$ ).

## Sub-sample analysis by age

In terms of overall current drinking severity during quarantine, older individuals ( $5.9 \pm 4.82$ , [CI: 5.44-6.36], range 1-28) showed significantly more problem drinking behaviours than younger individuals ( $4.74 \pm 4.46$ , [CI: 4.32-5.17], range 1-32); (U= 4.94, [CI: 0.00-0.00],  $p < .0001$ ). The older individuals ( $\geq 25.1$  years) in the sample (n=432) also showed a significant increase in drinking severity from November ( $4.02 \pm 2.13$ , [CI: 3.82-4.23], range 1-13) to quarantine ( $4.18 \pm 2.35$ , [CI: 4-4.23], range 1-13); (U= 2.07, [CI: 0.05-0.98],  $p = .04$ ). Further, the mean number of units of alcohol consumed between November ( $9.93 \pm 14.24$ , [CI: 8.58-11.27], range 0-150) and the quarantine period ( $10.91 \pm 16.96$ , [CI: 9.31-12.52], range 0-120) was significantly increased (U= 2.75, [CI: 0.01-0.84],  $p = .006$ ).
